# Supplementary material for: Identification of the CDPK gene family in patchouli and functional analysis in response to continuous cropping stress
Source: Front Plant Sci. 2023 Nov 22;14:1300073. doi: 10.3389/fpls.2023.1300073 (PMC10702526; doi:10.3389/fpls.2023.1300073)
Supplement: Supplementary file 2 [file Table_1.xlsx]

## Sheet: Sheet1
Protein Sequences of 45 PcCDPK Members
>PcCDPK1
MGGCFSKNKYATRDVNGYRSERANNAGYQQTQQNYQKPSAQTEIPVNPDVRRHHPPPQTQ
HQPPIPSPHRTAQQPQTPVQKLEPNNILRKHFEDVRSKYMIGKELGRGQFGITYTSTEIA
TGHQYACKSILKRKLVSKNDRDDMKREVHIMQHLSGQPNIVEFKGAYEDKQSVHLVMELC
GGGELFDRIIAQGHYSEKDAADLCRQIVNVVHHCHFMGVMHRDLKPENFLLSSKDEKAML
KATDFGLSVFIEEGKVYRDIVGSAYYVAPEVLRRNYGKEIDVWSAGVILYILLSGVPPFW
AETEKGIFDAILKEEVDFDSDPWPVISNSAKDLVRKMLTKDPKKRITSTEVLEHPWIKGQ
APDKRIDSAVLSRMKQFRAMNKLKKLALKVIAQSLSEEEIKGLKAMFKNMDTDNSGSITY
EELKSGLARLGSKLSETEVKQLMEAADVDGNGTIDYDEFITATMHRHKLERDEHLFSAFQ
YFDRDGSGYITRDELETAMKEYGIGDEASIKEIIMEVDTDNDGRINYEEFCAMMRSGTTQ
QVKLF
>PcCDPK2
MIMISPSEPLKPKKAHNVKRMMSVGLQVDSVLRTKTGHLKEHFNLGRKLGHGQFGTTFLC
VDMKTGKEYACKSIAKKKLLTQDDVDDVRREIEIMHHLSGNPNVISIKGAYEDAVAVHVV
MVLCKGGELFDRIVKHGHYSEKKTAELTRTIVGVIETCHSLGVMHRDLKPENFLFVNDDE
DSPIKTIDFGLSVFFKPGQIFGDVVGSPYYVAPEVLCKRYGSEADVWSAGVIVYILLTGV
PLFWGGNKISEQEIFEEVLHGETDFTSDPWPKISKFFHLCTGHPWVQVNGLAPDKPLDPA
VLSRLTHFSAMDKLKKMALRVIAESLSEEEIAGLKEMFKMIDTDHSGYITFQELKAGLKR
YGANLDDSEIHELMKAADVDNSGAIDYGEFIAATLHLNKIDKEDHLFRAFSYFDRDGSGY
ITQDELQKACKEFGIEDDHLDELIRKVDQNNDGRIDYNEFVAMMQKGNADFGKKRFQNNF
SIGFREAMPVY
>PcCDPK3
MGNNCVNAKIGKDGFFSTISHSLWWSKSPDMISYNNNTKQKGCLKHVEPPSDPIPMNPPQ
QMKIEEDKEQIKPPQPAKIEQPQTIQENETMIINQTEPQKPKKVHNVKRMMSVGLQVDSV
LRTKTGHLKEHFNLGRKLGHGQFGTTFLCVDRKTGKEYACKSIAKRKLLTQDDVDDVRRE
IEIMHHLSGNPNVISIKGAYEDAVAVHVVMELCKGGELFDRIVKRGHYSEKKAAELTRTI
VGVIETCHSLGVMHRDLKPENFLFVNDDEDSPIKTIDFGLSVFFKPGQIFGDVVGSPYYV
APEVLCKRYGPEADVWSAGVIVYILLTGVPPFWGESEQEIFEEVLHGETDFTSDPWPKIS
ESAKDLVKKMLVRDPRKRLTAHQVLCHPWVQVNGVAPDKPLDPAVLSRLTHFSAMDKLKK
MALRVIAESLSEEEIAGLKEMFKMIDTDNSGYITFQELKAGLKRYGANLDESEIHELMKA
ADVDNSGTIDYGEFIAATLHLNKIDKEDHLFRAFSYFDKDGSGYITQDELQKACEEFGIE
DDHLDDLMREVDQNNDGRIDYNEFVAMMQKGNADFGKKKLQNNFSIGFREAMPVY
>PcCDPK4
MGNCSTGGGTSSNPPSSQADGGPKPKINVVPADAPPPPRRPLPTGPGRILGRPMSDIQSA
YIFGRELGRGQFGVTHLVTHRVTRQNFACKSIATRKLISPDDVADVRREVQIMHHLTGHR
NIVELKEVFEDRHNVHLVMELCAGGELFDRIIAKGHYSERAAAGLCRQIVTVVHTCNSMG
VMHRDLKPENFLFLSTAEDSPLKATDFGLSVFFKPGDSFRDLVGSAYYVAPEVLRRNYGV
EADIWSAGVILYILLSGVPPFWGENEQGIFDAIQRGHLDFVSDPWPSISSSAKDLVKKML
QSDPKDRITAVDVLNHPWMREGGNASDKPLDIAVLTRMKQFRAMNKLKKVALKVIAENLS
EEEIIGLKEMFKSMDTDNSGTITFEELKAGLPKLGTKLSESEVRQLMEAADVDGNGTIDY
IEFITATMHMNRVEREDHLYKAFEYFDKDKSGYITMEELEQALTEYNMGDAKTIKEILAE
VDTDNDGKINYDEFVAMMRKGNPDMGAPRRRK
>PcCDPK5
MGNTCAGPKLGKNGFFQSVTAAVWKPRAQGTLPAPDQEQEIKDADQNDSSVQSESKASEV
QSTPPAAIKISSDEAKPTDSQKPANQDGKSENHSNTNNPSNNKPTEGAKQNKPNHIKRVS
SAGLQVESVLQRKTENMKDKYTLGRKLGQGQFGTTFLCVEKATNKEFACKTIAKRKLTTE
EDVEDVRREIQIMHHLAGHPNVISIVGAYEDAVAVHVVMELCAGGELFDRIIQRGHYTER
KAAELARIIVGVVEACHSLGVMHRDLKPENFLFANQKEEAPLKTIDFGLSIFFRPGEIFT
DVVGSPYYVAPEVLRKNYGQECDVWSAGVIIYILLCGVPPFWDETEQGIFEQVLKGELDF
VSEPWPSISESAKDLVRRMLVRDPRKRLTAHQVLCHPWVQVGGVAPDKPLDSAVITRLKQ
FFAMNKLKKIAIRVIAESLSEEEIAGLKEMFKMIDVDGSGHITLEEMKRGLERAGANLKE
SEIENLMQAADFDNSGTIDYQEFVAAMLHLNKVQKEDHMYAAFSYFDKDGSGYITKDELQ
QACDQFGLGDVHLDEIISEVDKDNDGRIDYSEFVAMMQDTSFASKALQNSISIELKDTHS
VP
>PcCDPK6
MGFCFSKFRRHRDIPISSSSPSDSPPHPHYPIHHPPPPPPPPVLTAAPPPPTIGLILGKP
YVDITTLYDLDKELGRGQFGITYLCTEKSSGYKFACKSISRRKLVTEKDIQEVRREIMIL
QHLTGQPNIVEFKGAYEDKRNLHLVMELCSGGELFDRITQRGSYSEKEAARIGRQIVNVV
HVCHFMGVMHRDLKPENFLMVSRDDDSPLKATDFGLSVFIEEEKVYKDLVGSAYYVAPEV
LKRNYGKEIDVWSAGVILYILLSGFPPFWGETEKAIFEEILKGHVDLETSPWPSISFGAK
DLIKKMLTIDPKKRISAAEALEHPWLKEDGDASDKPMDSAVLVRMKQFRAMNKLKKLALK
VIAENLSEEEIKGLRQMFNNIDTDGSGTITYDELRTGLTKLGSRLSEAELQQLMDAADVD
KNGTIDYYEFITATMHRHKLEKEENLHKAFRHFDKDDSGYITRDELRQAMTEYGMGDEAT
IDEVLDDVDTDKDGKINYDEFVAMMRKGSVDFPEHLRTE
>PcCDPK7
MNPPQQMKIEEEKEQIKPPQPAKIEQPQTIQENETMIINQTEPPKAKKAHNVKRMMSVGL
QVDSVLRTKTGHLKEHFNLGGKLGHGQFGTTFLCVDRKTGKEYACKSIAKRKLLTQDDVD
DVRREIEIMHHLSGNPNVISIKGAYEDAVAVHVVMELCKGGELFDRIVKRGHYSEKKAAE
LTRTIIGVIETCHSLGVMHRDLKPENFLFVNDDEDSPIKTIDFGLSVFFKPGQIFGDVVG
SPYYVAPEVLCKRYGPEADVWSAGVIVYILLTGVPPFWGESEQEIFEEVLHGETDFTSDP
WPKISESAKDLVKKMLVRHPRKRLTAHQVLCHPWVQVNGVAPDKPLDPAVLSRLTHFSAM
DKLKKMALRVIAESLSEEEIAGLKEMFKMIDIDNSGYITFQELKAGLKRYGANLDESEIH
ELMKAADVDNSGTIDYGEFIAATLHLNKIDKEDHLFRAFSYFDKDGSGYITQDELQKACE
EFGIEDDHLDDLIREVDQNNDGRIDYNEFVAMMQKGNADFGKKRLQNNFSIGFREAMPGL
YGPFDSNMNPDANYSTAFPNSKSACPNYSDPFQLFVFLIPSFCKPCHHTCLPAAQFTFRL
QRTAESTFSAENQG
>PcCDPK8
MGNCNACIRPSESEPSTPRPQTPKQAKKNRERYPNPYAQSPTPIRVLKDFIPRTRISDKY
ILGRELGRGEFGITYLCTDRETREALACKSISKKKLRTAVDIEDVRREVAIMSRLPEHPN
IVKLRATYEDNEAVHLVMELCEGGELFDRIVAHGHYSERAAAAVERTVAEVVRMCHHHGV
MHRDLKPENFLFANKKENSALKAIDFGLSVFFKPGEKFSEIVGSPYYMAPEVLKRNYGQE
VDIWSAGVILYILLCGVPPFWAETEQGVALAILRGVLDFKREPWPQVSESAKSLVRQMLE
PDPKKRLTAQQVLDHPWIQNAKKAPNVPLGDIVRARLKQFSVMNKFKKKVLRVIAEHLSV
EEVEVIRDMFALMDTNNDGKVTYEELKAGLRKVGSQLAEPEIKLMMDVADVDGNGVLDYG
EFVAVTIHLQRMENDEHFRRAFMFFDKDGSGYIEFDELRQGLVDESGETDLDALKNIMQE
VDTDKDGRISYEEFVAMMKTGTDWRKASRQYSRERFKSLSLNLMRDGSLQLHDGFTGQTV
VV
>PcCDPK9
MGNNCVGPNVGNKQGFFQSVTAAVWRNRQPPPEILPTENADSSKNNQNSENEASASSSRS
DVQSNPPTPMKITSDEAKREETDKKTGEGAKSKKPSHMKRVSSMGLQVDSVLQRKTENIK
DLYSLGRKLGQGQFGTTYLCIEKATNKSFACKTIAKRKLTTQEDVEDVRREIQIMHHLTE
HPNVISIVGAYEDAVAVHVVMDLCTGGELFDRIIQRGHYTERKAAELARIIVGVVEACHS
LGVMHRDLKPENFLFVSEEEESVLKTIDFGLSMFFKPGETFVDVVGSPYYVAPEVLKKLY
GQECDVWSAGVIVYILLCGVPPFWDETEQGIFEQVLKGELDFVSEPWPSISESAKDLVRK
MLVRDPKKRLTAYQVLCHPWVQVNGEAPDRPLDSAVLSRLKQFSAMNRLKKIAIRVIAES
LSEEEIAGLKEMFKMIDVDNSGQITLEELKKGLEKVGADLNEGEILHLMQAADVDNSGTI
DYGEFVAAMLHLNKVQKEDHMYAAFSYFDKDGSGYITHDELQQACQQFGLENIHIEELIR
EVDQDNDGRIDYNEFVAMMQDTGFGKISLRAASLKCNPSN
>PcCDPK10
MVCEIYRANARERKWQQKQIVLMYRHERDSHGRIRMGNSCVHGKTSEDGILYAVSRSFWP
SRSPDMTAISVNDKSVDGSKDQSHVDPPKVVKMEDEELNRSPPLKFNPVVVVKEESKVSK
DQSHVNPPISVKMEDEEINRSPPLKFNPVVVVKEESKVPKDQSHVNPPKLVKMEDEESKV
VDEVEHVIMTVKENPKPVAKKPPRNIKRKMSVGLEVESVLRTRTGHLKEHFNLGEKIGRG
QFGTTFLCIERKTGKKYACKSIAKRKLLEEDDLEDVRREIEIMHHLSGHPNVVSIQGAYE
DAVAVHVVMELCGGGELFDRILKRGHYSEKKAAELTRTIAGVIETCHSLGVMHRDIKPEN
FLFVNNDEDSPMKIIDFGLSVFFKPGETFCDVVGSPYYVAPEVLRKRYGPEADVWSVGVI
IYILLCGTPPFWAETEQEIFEEVLRGDIDFTSDPWPNISESAKDLVKKMLVRDPKKRITA
HQVLCHPWLQVQGVAPDKPLDSAVLSRMTQFSAMHKLKKMAIRVIAESLSEEEIAGLREM
FKTIDTDNSGYITFEELKDGLTKYGANLDESQIHDLMRAADVNNNGAIDYGEFIAATLHA
NKIDKDDHLVKAFSYFDRDGSGYITKDELQTACLEFGIQDFHLEEMIQEADQNNDGRIDY
NEFVAMMHKGDRDLSKKKFKKDFGVEFRESMQVC
>PcCDPK11
MGLCVSKQKPVKTNTNGHPTHQQNPIQFTMSPGYAAQLPHVLPPGSPAPPVHKPDAILGK
PYEDIKAHYVLGKELGRGQFGVTHLCTDIVTGQEYACKSISKKKLVTKSDKEDMRREIQL
MQHLSGQPNIVEFKGAYEDKSSVHLVMELCGGGELFDRIIAKGHYSERAAAAICRSIVGV
VQICHFMGVMHRDLKPENFLLSDKTENALLKATDFGLSVFIEEGKIYKDVVGSAYYVAPE
VLRRKYGKEIDIWSAGVILYILLSGVPPFWAETERGIFDAILQGHVDFDSKPWPSISDGA
KDLVRKMLTQDAKKRITAAEVLEHPWIKEGGEASDKPIDSAVLSRMKQFRAMNKLKKLAL
KVIAENLSTEEIQGLKAMFTNMDTDKSGTITYEELKAGLARLGSKLTEAEVRQLMDAADV
DGNGTIDYIEFITATMHRHRLEREENLYKAFQYFDKDGSGFITRDELETAMQEYGMGDAS
TIKEIIAEVDSDNDGRINYEEFCTMMRTGNQHQGLIL
>PcCDPK12
MGNSCVHGKTSEDGILYAVSRSFWPSRSPDMTAISGNYKSVDGSKDQSHVDPPKVVKMED
EELNRSPPLKFNPVVVVKEESKVSKDQSHVNPPILVKMEDEEINRSPPLKFNPVVVVKEE
SKVSKDQSHVMEDEESKVVDEVEHVIMTVKENPKPVAKKPPRNIKRKMSVGLEVESVLRT
RTGHLKEHFNLGKKIGRGQFGTTFLCIERKTGKKYACKSIAKRKLLEEDDLEDVRREIEI
MHHLSGHQNVVSIQGAYEDAVAVHVVMELCGGGELFDRILKRGHYSEKKAAELTRTIAGV
IETCHSLGVMHRDIKPENFLFVNNDEDSPMKIIDFGLSVFFKPGETFCDVVGSPYYVAPE
VLRKRYGPEADVWSVGVIIYILLCGTPPFWAETEQEIFEEVLRGDIDFTSDPWPNISESA
KDLVKKMLVRDPKKRITAHQVLCHPWVQVQGVAPDKPLDSAVLSRMTQFSAMHKLKKMAI
RVIAESLSEEEIAGLREMFKTIDTDNSGYITFEELKDGLTKYGANLDESQINDLMRAADV
NNNGAIDYGEFIAATLNVNKIDKDDHLVKAFSYFDRDGSGYITKDELQTACLEFGIQDFH
LEEMIQEADQNNDGRIDYNEFVAMMHKGDRDLSKKKFKKDFGVEFRESMQVC
>PcCDPK13
MGNNCVGPNVGNKQGFFQSVTAAVWRNRQPPPEILPTENAEKDSSKNNQNLENEASASSS
RSDVQSNPPTPMKITSDEAKREELDKKTGEGAKSKKPAHMKRVSSMGLQVDSVLQRKTEN
IKDLYSLGRKLGQGQFGTTYLCIEKATNKSFACKTIAKRKLTTQEDVEDVRREIQIMHHL
AEHPNVISIVGAYEDAVAVHVVMDLCAGGELFDRIIQRGHYTERKAAELARIIVGVVEAC
HSLGVMHRDLKPENFLFVSEEEESVLKTIDFGLSMFFKPGETFVDVVGSPYYVAPEVLKK
HYGQECDVWSAGVIVYILLCGVPPFWDETEQGIFEQVLKGELDFVSEPWPSISESAKDLV
RKMLVRDPKKRLTAYQVLCHPWVQVNGEAPDRPLDSAVLSRLKQFSAMNRLKKIAIRVIA
ESLSEEEIAGLKEMFKMIDVDNSGQITLEELKKGLEKVGADLNEGEILHLMQAADVDNSG
TIDYGEFVAAMLHLNKVQKEDHMYAAFSYFDKDGSGYITHDELQQACEQFGLENIHIEEL
IREVDQDNDGRIDYNEFVAMMQDTGFGKISLRAASLKCNPSN
>PcCDPK14
MGNTCVGPGITKNGFIQSVSAAMWRSPVPESNSSSVNGDSVKNEATVEPESTLPVQNTPP
ERVTMPKPEPKVEQAQPVAQPTNAKKPMKRNTSAGLRTDSVLQRKTGNLKEFFSMGKKLG
QGQFGTTFLCVEKATGTQYACKSIAKRKLLTDEDVEDVRREIQIMHHLSGHPNVISIKGA
YEDAVAVHVVMELCAGGELFDRIIQRGHYTERKAAELTRTIVGVVEACHSLGVMHRDLKP
ENFLLVDQKEDSLLKTIDFGLSMFFKPGEKFHDVVGSPYYVAPEVLRKRYGPEADVWSAG
VIVYILLSGVPPFWAENEQGIFEQVLHGDLDFESDPWPSISEGAKDLVRKMLVRDPKRRL
TAYEVLCHPWVQVDGVAPDKPLDSAVLSRMKQFSAMNRLKKMALRVIAESLSEDEIAGLK
ELFKMIDTDNSGTITFEELEAGLKRVGANLKESEIYDLMQAADADNSGTIDYGEFIAATL
HLNKIDKQDHLFAAFSYFDKDGSGYITHDELQQACQEFGFDDTRLEEMIQEVDQDNDGRI
DYNEFVTMMQKGNPIAGGVKRGLENSFSINFREALKLT
>PcCDPK15
MGNCCSRSDDDQSAADSSAEDAPKNAAAATTAPQPSPPPTSASPAKPSHMGPVLGRPMED
IKATYTMGKELGRGQFGVTHLVTHKQSGEQFACKTIAKRKLANKEDIEDVRREVQIMHHL
AGQPNIVELKGAYEDKHSVHLVMELCAGGELFDRIIAKGHYTERAAASLMRTIVQIVHTC
HCMGVIHRDLKPENFLLLSKDENAPLKATDFGLSVFYKEGEQFKDIVGSAYYIAPEVLKR
RYGPEADIWSIGVMLYILLSGVPPFWAESETGIFNSILRGHIDFSSDPWPSISSGAKDLV
RKMLNSDPKQRLSASQVLNHPWIKEDGEAPDTPLDNAVLNKLKQFRAMNKFKKVALRVIA
GCLSEEEIMGLKEMFKGMDTDNSGTITLEELKQGLSNQGTNLTQIEVKQLMEAADADGNG
TIDYEEFITATMQMNRMDREEHLYTAFQYFDKDNSGFITIEELEQALREYGMDDDKDIKE
IISEVDDDNDGRINYDEFVAMMQKGNPDMAANTKKRRSGVFGT
>PcCDPK16
MGNCNACIRPSESEPSTPRPQTPKQAKKNRERYPNPYAQSTTPIRVLKDFIPRTRISDKY
ILGRELGRGEFGITYLCTDRETREALACKSISKKKLRTAVDIEDVRREVAIMSRLPEHPN
IVKLRATYEDNEAVHLVMELCEGGELFDRIVARGHYSERAAAAVARTVAEVVRMCHHHGV
MHRDLKPENFLFANKKENSALKAIDFGLSVFFKPGEKFSEIVGSPYYMAPEVLKRNYGQE
VDIWSAGVILYILLCGVPPFWAETEQGVALAILRGVLDFKREPWPQVSESAKSLVRQMLE
PDPKKRLTAQQVLDHPWIQNAKKAPNVPLGDIVRARLKQFSVMNKFKKKVLRVIAEHLSV
EEVEVIRDMFALMDTNNDGKVTYEELKAGLRKVGSQLAEPEIKLMMDVADVDGNGVLDYG
EFVAVTIHLQRMENDEHFRRAFMFFDKDGSGYIEFDELREGLVDESGETDLDAVNNIMQE
VDTDKDGRISYEEFVAMMKTGTDWRKASRQYSRERFKSLSLNLMRDGSLQLHDGFTGQTV
VV
>PcCDPK17
MGCCFSRGTKEDAPAEPTTTTTNATAPTTGGEAPANTSATTPPRTPPHASPNQAAKLSKP
VQIGPVLGRPMEDVRATYTIGKELGRGQFGVTHFCAHKQTGQHYACKTIAKRKLATKEDI
EDVRREVQIMHHLTGQPNIVELKGAYEDKHSVHLVMELCAGGELFDRIIAKGHYTERAAA
SLLRTIVQIVHTCHSMGVIHRDLKPENFLLLSKDKNSPLKATDFGLSVFYKEGDVFKDIV
GSAYYIAPEVLKRQYGPEVDIWSIGVMLYILLSGVPPFWAESENGIFRAILKGHVDFSSD
PWPSISSGAKDLVKKMLNSDPKQRISAFQVLNHPWIKEDGEAPDIPLDNSVLNRLKQFRA
MNQFKKVALRVIAGCLSEEEITGLKQMFKGMDVDNSGTITLEELKQGLSKQGTKLSEYEV
QQLMEAADADGNGTIDYEEFITATMHMNRMDREEHLYTAFQYFDKDNSGYITIEELEQAL
REFGMDNEKDIKDIITEVDSDNDGRINYDEFAAMMKKGNPETAPNLKKRRTGVFVS
>PcCDPK18
MGNCCSRSDDAPPDDQSAADSSAEDAPKNAAAATTAPQPSPPPTSASPAKPTKPSHMGPV
LGRPMEDIKATYTMGKELGRGQFGVTHLVTHKQSGEQFACKTIAKRKLANKEDIEDVRRE
VQIMHHLAGQPNIVELKGAYEDKHSVHLVMELCAGGELFDRIIAKGHYTERAAASLMRTI
VQIVHTCHCMGVIHRDLKPENFLLLNKDENAPLKATDFGLSVFYKEGEQFKDIVGSAYYI
APEVLKRRYGPEADIWSIGVMLYILLSGVPPFWAESETGIFNSILRGHIDFSSDPWPSIS
SGAKDLVRKMLNSDPKQRLSASQVLNHPWIKEDGEAPDTPLDNAVLNKLKQFRAMNKFKK
VALRVIAGCLSEEEIMGLKEMFKGMDTDNSGTITLEELKQGLSNQGTNLTQIEVKQLMEA
ADADGNGTIDYEEFITATMQMNRMDREEHLYTAFQYFDKDNSGFITIEELEQALREYGMD
DDKDIKEIISEVDDDNDGRINYDEFVAMMQKGNPDMAANTKKRRSGVFGT
>PcCDPK19
MGCCFSRGTKEDAPAEPTTTTTNAAAPTTGGEAPANTSAITPPRTPPHASPNQAAKPSKP
VQIGPVLGRPMEDVRATYTIGKELGRGQFGVTHFCAHKQTGQHYACKTIAKRKLATKEDI
EDVRREVQIMHHLTGQPNIVELKGAYEDKHSVHLVMELCAGGELFDRIIAKGHYTERAAA
SLLRTIVQIVHTCHSMGVIHRDLKPENFLLLSKDKNSPLKATDFGLSVFYKEGDVFKDIV
GSAYYIAPEVLKRQYGPEVDIWSIGVMLYILLSGVPPFWAESENGIFRAILKGHVDFCSD
PWPSISSGAKDLVKKMLNSDPKQRISAFQVLNHPWIKEDGEAPDIPLDNSVLNRLKQFRA
MNQFKKVALRVIAGCLSEEEITGLKQMFKGMDVDNSGTITLEELKQGLSKQGTKLSEYEV
QQLMEAADADGNGTIDYEEFITATMHMNRMDREEHLYTAFQYFDKDNSGYITIEELEQAL
REFGMDNEKDIKDIITEVDSDNDGRINYDEFAAMMKKGNPETAPNLKKRRTGVFVS
>PcCDPK20
MGNCCSRSDDAPPDDAAAEGVPNSSAEDAPKNAAAATTAPQPSSPPTSASPAKPTKPSHM
GPVLGRPMEDIKATYTMGKELGRGQFGVTHLVTHKQSGEQFACKTIAKRKLANKEDIEDV
RREVQIMHHLAGQPNIVELKGAYEDKHSVHLVMELCAGGELFDRIIAKGHYTERAAASLM
RTIVQIVHTCHCMGVIHRDLKPENFLLLNKDENAPLKATDFGLSVFYKEGEQFKDIVGSA
YYIAPEVLKRRYGPEADIWSIGVMLYILLSGVPPFWAESETGIFNSILRGHIDFSSDPWP
SISSGAKDLVRKMLNSDPKQRLSASQVLNHPWIKEDGEAPDTPLDNAVLNKLKQFRAMNK
FKKVALRVIAGCLSEEEIMGLKEMFKGMDTDNSGTITLEELKQGLSNQGTNLTQIEVKQL
MEAADADGNGTIDYEEFITATMQMNRMDREEHLYTAFQYFDKDNSGFITIEELEQALREY
GMDDDKDIKEIISEVDDDNDGRINYDEFVAMMQKGNPDMAANTKKRRSGVFGT
>PcCDPK21
MSSSSTSHSHSHSQNHDEEVEEKPKSEAKKLSFLGQKPTWVLPYRTQSLKSVYSIGKKLG
QGQFGITFLCTEKSSGIPYACKSIPKKKLICKEDYEDVWREIQIMHHLSEHPNVVRIKGT
YEDAVFVHIVMELCGGRELFDRIVHKGHYSEREAAKLIKTIVGVVEACHSLGVMHRDLKP
ENFLFISADEVASLKATDFGLSVFYKPDETFCDVVGSPYYVAPEVLRKHYGHEADVWSAG
VILYILLSGVPPFWAETEMGIFRQILRGKLDFDSEPWPGISDVAKDLIRKMLDRNPKTRL
TAHGVLCHPWIIDDTMAPDKPLDSAVLSRLKQFSAMNKLKKMALRVIAERLSEEEIGGLK
ELFKMIDTDNSGTITFDELKEGLRRVGSTLMESEIKDLMDAADIDNSGTIDYGEFLAATV
HLNKLEREENLLSAFSFFDKDGSGYITIDELQQACKEFGLSELNLDEMIREIDQDNDGQI
DYGEFAAMMRKGNGGIGRGTMRKTINLGEALGLTQRS
>PcCDPK22
MSLSSTSHSHGQNPDEEVEEKPKSEAKKLSFLGQKPTWVLPYRTQSLKSVYSIGKKLGQG
QFGITFLCTEKSSGIPYACKSIPKKKLICKEDYEDVWREIQIMHHLSEHPNVVRIKGTYE
DAVFVHIVMELCAGGELFDRIVHKGHYSEREAAKLIKTIVGVVEACHSLGVMHRDLKPEN
FLFISADEDAALKATDFGLSVFYKPDETFCDVVGSPYYVAPEVLRKHYGHEADVWSAGVI
LYILLSGVPPFWAETEMGIFRQILRGKLDFDSEPWPGISDVAKDLIRKMLDRNPKTRLTA
HEVLCHPWIIDDTMAPDKPLDSAVLSRLKQFSAMNKLKKMALRVIAERLSEEEIGGLKEL
FKMIDTDNSGTITFDELKEGLRRVGSTLMESEIKDLMDAADIDNNGTIDYGEFLAATVHL
NKLEREENLLSAFSFFDKDGSGYITIDELQQACKEFGLSELNLDEMIREIDQDNDGQIDY
GEFAAMMRKGNGGIGRRTMRKTINLGEALGLTPRS
>PcCDPK23
MGNTCRGSSGGKPFQGYNVPEDQSNSKRKGSSTCSDTSENHSSTSLTLQHPSKQEFSKDH
SNHKENSNPPLISPRKDNIMNRGATNQAYFVLGHKTANIRDLYTLGRKLGQGQFGTTYLC
TEISTGIEYACKSISKRKLISKEDVEDVRREIQIMHHLAGHKNIVTIKGAYEDPLYVHIV
MELCAGGELFDRIIQRGHYSERKAAQLTKIIVGVVEACHSLGVMHRDLKPENFLLVNKDD
DFSLKAIDFGLSVFFKPGQIFTDVVGSPYYVAPEVLLKHYGPEADVWTAGVILYILLSGV
PPFWAETQQGIFDAVLKGHIDFDSDPWPLISESAKDLIRQMLCMRPSDRLTAHEVLCHPW
ICENGVAPDRALDPAVLSRLKQFSAMNKLKKMALRVIAESLSEEEIAGLKEMFKAMDTDN
SGAITFDELKAGLRKYGSTLKDFEIRDLMDAADVDNSGTIDYGEFIAATIHMNKLDREEH
LLAAFQYFDKDGSGYITVDELQQACVEHSMTDVFIEDIIKEVDQDNDGRIDYGEFVAMMT
KGNGGIGRRTMRNSLNISMRDAPGAL
>PcCDPK24
MGNSCVHGKTSEDGILYAVSRSFWPSRSPDMTAISGNDKSVDCSKDQSHVDPPKVVKLED
EELNRSPPLKFNPVVVVKEESKVSKDESHVNPPKLVKMEDEEFKVVDEVEHVIMTVKENP
KPVAKKPPRNVKRKMSVGLEVESVLRTRTGHLKEHFNLGEKIGRGQFGTTFLCIERKTGK
KYACKSIAKRKLLEEDDLEDVRREIEIMHHLSGHPNVVSIQGAFEDAVAVHVVMELCGGG
ELFDRILKRGHYSEKKAAELTRTIAGVIETCHSLGVMHRDIKPENFLFVNNDEDSPMKII
DFGLSVFFKPGETFCDVVGSPYYVAPEVLRKRYGPEADVWSVGVIIYILLCGTPPFWAET
EQEIFEEVLRGDIHFTSDPWPNISESAKDLVKKMLVRDPKKRITAHQVLCHPWVQVQGVA
PDKPLDSAVLSRMTQFSAMHKLKKMAIRVIAESLSEEELAGLREMFKTMDTDNSGYITFE
ELKNGLTKYGANLDESQIHDLMRAADVNDNGAIDYGEFIAATLNVNKIDKDDHLVKAFSY
FDRDGSGYITKDELQTACLEFGIQDFHLEEMIQEADQNNDGRIDYNEFVAMMHKGDRDLS
KKKFKKDFGVEFRESIQVC
>PcCDPK25
MGNCNACIKPSEKKSPNSKPSTPKPRKKHREHYPNPYTGSPSPIRVLKDFFPRTKISDKY
ILGRELGRGEFGITYLCTDRETREALACKSISKKKLRTAVDIEDVRREVAIMSSLPEHHN
IVKLRATYEDNEAVHLVMEMCEGGELFDRIVARGHYSERAAAGVARTVAEVVRMCHQNGV
MHRDLKPENFLFANKKENSALKVIDFGLSVFFKPGERFSEIVGSPYYMAPEVLKRNYGPE
VDIWSSGVILYILLCGVPPFWAETEQGVALAILRGVIDFKREPWPQISESAKSLVRQMLE
LDPKKRLTAQQVLDHPWIQNAKKASNVPLGDIVRARLKQFSVMNRFKKKALRVVAEHLSV
EEVEVIREMFAIMDTDNDGKVTYEELKAGLRKVGSQLAEPEIKLLMDVADVDGNGVLEYG
EFVAVTIHLQRMENDEHFRKAFNFFDKDGSGFIDLDELHEALADESGEADLDVLNNIMRE
VDTDKDGQISYDEFVAMMKTGTDWRKASRQYSRERFKSLSLNLMKDGSLQLQDGLTGHTV
MV
>PcCDPK26
MGNTCAGPKLGKNGFFQSVTAAVWKPRAQGTLPAPDQEQEIKDTDQNNDSSVQSESKASE
VQSTPPAAIKISSDEAKPTDSQKPANQDGKSENHSNTNNNPTEGAKQNKPNHIKRVSSAG
LQVESVLQRKTENMKDKYTLGRKLGQGQFGTTFLCVEKATNKEFACKTIAKRKLTTEEDV
EDVRREIQIMHHLAGHPNVISIVGAYEDAVAVHVVMELCAGGELFDRIIQRGHYTERKAA
ELARVIVGVVEACHSLGVMHRDLKPENFLFANQKEEAPLKTIDFGLSIFFRPGEIFTDVV
GSPYYVAPEVLRKNYGQECDVWSAGVIIYILLCGVPPFWDETEQGIFEQVLKGELDFVSE
PWPSISESAKDLVRRMLVRDPRKRLTAHQVLLQVGGVAPDKPLDSAVITRLKQFFAMNKL
KKIAIRVIAESLSEEEIAGLKEMFKMIDVDGSGHITLEEMKKGLERAGANLKESEIENLM
QAADFDNSGTIDYQEFVAAMLHLNKVQKEDHMYAAFSYFDKDGSGYITKDELQQACDQFG
LGDVHLDEIISEVDKDNDGRIDYSEFVAMMQDTSFASKALHNSISIELKDSS
>PcCDPK27
MGNTCAGPKLGKNGFFQSVTAAVWKPRAQGTLPAPDQEQKIKDTDQNNDSSVQSESKASE
VQSTPPAAVKISSDEAKPTDSQKPANQDVKSENHINTNNKPTEGAKQNKPNHIKRVSSAG
LQVESVLQRKTENMKDKYTLGRKLGQGQFGTTFLCVEKATNKEFACKTIAKRKLTTEEDV
EDVRREIQIMHHLAGHPNVISIVGAYEDAVAVHVVMELCAGGELFDRIIQRGHYTERKAA
ELARIIVGVVEACHSLGVMHRDLKPENFLFANQKEEAPLKTIDFGLSIFFRPGGIFTDVV
GSPYYVAPEVLRKNYGQECDVWSAGVIIYILLCGVPPFWDETEQGIFEHVLKGELDFVSE
PWPSISESAKDLVRRMLVRDPRKRLTAHQVLCHPWVQVGGVAPDKPLDSAVITRLKQFFA
MNKLKKIAIRVIAESLSEEEIAGLKEMFKMIDVDGSGHITLEEMKKGLERAGANLKESEI
ENLMQAADFDNSGTIDYQEFVTAMLHLNKVQKEDHMYAAFSYFDKDGSGYITKDELQQAC
DQFGLGDVHLDEIISEVDKDNDGRIDYSEFVAMMQDTSFASKALQNSISIELKDSS
>PcCDPK28
MGNSCVHGKTSEDGILYAVSRSFWPSRSPDMTTISGNDKSLDCSKDQSHVDPPKVVKLED
EELNRSPPLKFNPVVVVKEESKVSKDQSHVNPPKLVKMEDEEINISPPLKFNPVVVVKEE
SKVSKDQSHSHVNPPKLVKMEDEEFKVVDEVEHVIMTVKENPKPVAKKPPRNVKRKMSVG
LEVESVLRTRTGHLKEHFNLGEKIGRGQFGTTFLCIERKTGKKYACKSIAKRKLLEEDDL
EDVRREIEIMHHLSGHPNVVSIQGAYEDAVAVHVVMELCGGGELFDRILKRGHYSEKKAA
ELTRTIAGVIETCHSLGVMHRDIKPENFLFVNNDEDSPMRIIDFGLSVFFKPGETFCDVV
GSPYYVAPEVLRKRYGPEADVWSVGVIIYILLCGTPPFWAETEQEIFEEVLRGDIDFTSD
PWPNISESAKDLVKKMLVRDPKKRITAHQVLCHPWVQVQGVAPDKPLDSAVLSRMTQFSA
MHKLKKMAIRVIAESLSEEELSGLREMLKTMDTDNSGYITFEELKNGLTKYGANLDESQI
HDLMRAADVNDNGAIDYGEFIAATLNVNKIDKDDHLVKAFSYFDRDGSGYITKDELQTAC
LEFGIQDFHLEEMIQEADQNNDGRIDYNEFVAMMHKGDRDLSKKKFKKDFGVEFRESMQV
C
>PcCDPK29
MKRRSTVSSSKITVTILPYQTPRLRDHYNLGRKLGQGQFGTTYHCVEKATGLEFACKSIP
KRKLLCKEDCDDVWREVQIMHHLSEYPSVVRIKGTFEDNMFVHLVMELCAGGELFDRIVQ
KGHYSERKAAQLMKTIVGVVEACHSLGVMHRDLKPENFLFDTPDEDAKLKATDFGLSVFY
KPGQYLFDVVGSPYYVAPEVLHKHYGPEIDVWSAGVILYILLSGVPPFWAETDNGIFRQI
LKGKIDFESEPWPHLSDSAKDLVQKMLNRDPRQRISAHEVLCHPWIVDDTVAPDKPLGSA
VLLRLKQFSAMNKLKKMALRVIAERLSEEEIGGLRQLFKMIDVDNSGTITFEELQQALKK
VGSELMESEIMSLMNAADIDNSGTIDYGEFLAATLHVNKMEREENLLAAFTFFDKDGSGY
ITTDELQQACKDFGLGDVHLDEIISEIDIDNDGRIDYGEFATMMRKGNPAVGSRTMRGNL
NFNLADALQGKEDKEEDES
>PcCDPK30
MGNNCVGPNVGNKQGFFQSVTAAVWRNRQPPPEILPTENAEKDSGKNNQNLENEVSASSS
RSDVQSNPPTPMKITSDEAKREEPDKKTGEGAKSKKPAHMKRVSSMGLQVDSVLQRKTEN
IKDLYSLGRKLGQGQFGTTYLCIEKATNKSFACKTIAKRKLTTQEDVEDVRREIQIMHHL
AEHPNVISIVGAYEDAVAVHVVMDLCAGGELFDRIIQRGHYTERKAAELARIIVGVVEAC
HSLGVMHRDLKPENFLFVSEEEESVLKTIDFGLSMFFKPGETFVDVVGSPYYVAPEVLKK
HYGQECDVWSAGVIVYILLCGVPPFWDETEQGIFEQVLKGELDFVSEPWPSISESAKDLV
RKMLVRDPKKRLTAYQVLCHPWVQVNGEAPDRPLDSAVLSRLKQFSAMNRLKKIAIRVIA
ESLSEEEIAGLKEMFKMIDVDNSGQITLEELKKGLEKVGADLNEGEILHLMQAADVDNSG
TIDYGEFVAAMLHLNKVQKEDHVYAAFSYFDKDGSGYITHDELQQACEQFGLENIHIEEL
IREVDQDNVNASLLSETVLLFSYVWRCVSGNLTSLIEFQDGRIDYNEFVAMMQDTGFGKI
SLRAASLKCNPSN
>PcCDPK31
MGNCCAVPQTSDDKLNGKHKANPFAVGNGDHVVPSGGRKSYVLKNPTGHNIEEFYELGRE
LGRGEFGITYMCTDKATGEVFACKSISKKKLRTRVDVDDVRREVEIMRKLPKHPNIVSLK
DTYEDDHAVHLVMELCEGGELFDRIVARGHYTERAAAAVTRTIVEVIQVCHEHGVMHRDL
KPENFLFENMKETAPLKAIDFGLSVFFKPGERFNEIVGSPYYMAPEVLKRNYGPEVDVWS
AGVILYILLCGFPPFWSETEQGVAQAIIRSRVEFKRDPWPKVSDRAKDLVKKMLNPDPLE
RPTAQEVLDHPWLQNAKSAPNVSLGETVRARLKQFSMMNKLKKKALRVIAEHLSVEEVAG
IRDAFKLMDTSNKGKIDINELRVGLHKLGHQIPENDVQVLMEAGDVDKDGYLDYGEFVAI
SVHLRKMGNDDHLRKAFEFFDRDGSGYIEIEELRDAFADEAEVTSEDVINAIIQDVDTDK
DGRISYEEFAAMMKAGTDWRKASRQYSRERYTSLSLNLFKDGSLRLDNEGR
>PcCDPK32
MGNCCRSPTAVAREDVKSSNFSGHDHGRKEKSSGNVKKAITVLPDVKKENIEEKYLIDRE
LGRGEFGVTYLCIDRETRELLACKSISKRKLRTAVDIEDVRREVAIMKHLPKNSSIVSLR
EACEDENAVHLVMELCEGGELFDRIVARGHYTERAAAAVMRTIVEVVQLCHKHGVIHRDL
KPENFLFANKKENSPLKAIDFGLSIFFKPGEKFSEIVGSPYYMAPEVLKRNYGPEIDIWS
AGVILYILLCGVPPFWAESEQGVAQAIIRGKIDFEREPWPNISDTAKSLVRQMLEPDPKL
RLTAKQVLEHSWLQNAKKAPNVPLGDVVKSRLKQFSMMNRFKRKALRVISDFLSNEEVEG
IREIFNKIDTDSDGIVSTDELKAGLPKFNSQLAESEIQMLIEAVDVNGKGTLDYGEFLAI
SLHLQKMANDEHLHKAFSYFDKDGNGFIEPDELRDTLMEDGVDNCTDVANDIFQEVDTDK
DGLISYDEFVAMMKTGTDWRKASRHYSRGRFNSLSIKLMKDGSINLGE
>PcCDPK33
MGPCMSLQRKTALLRKKVTKQDDHNRLDIESPPHPHHHHPENVKFSGKLLRQSRPIHVLK
DATGDDILKKYRLGKELGRGEFGVTYECIDEASGESFACKKISKSKLRTDIDVEDVRREV
EIMRHLPAHPNIVRYKEVYEDKEAIYLVMELCEGGELFDRIVARGHYTERAASLVTKTIL
EVVKVCHEHGVIHRDLKPENFLFANNSENAPLKAIDFGLSIFFKPGQRFGEIVGSPYYMA
PEVLRRNYGPEIDVWSTGVILYILLCGVPPFWAETEEGIAQAIVYGEIDFERDPWPRVSE
DAKDLVKGMLDPNPYSRLTLDELLESRWIQNADKVPNIPLGERVRTRIKQFSLMNKFKKK
VLNDEVDGIKEMFHMMDTDKNGNLNFQELKDGLYMIGQPVPDHDVQLLLDAADCDGNGML
DCEEFVTLAVHLKKISNDDLLREAFLYFDKDQSGYIEFEELQLALLDDHSGPANDQIVHE
IIFDADLDKDGRISLEEFKAMMTTGMDWKMGSRQYSRAMLNALSVRLFNKDNNNLFN
>PcCDPK34
MGPCMSLQRKTALLRKKVTKQDHHNRLDIESPPHPHHPENVKFSGKLLRQSRPIHVLKDA
TGDDILKKYRLGKELGRGEFGVTYECIDEASGESFACKKISKSKLRTDIDVEDVRREVEI
MRHLPAHPNIVRYKEVYEDKEAIYLVMELCEGGELFDRIVARGHYTERAASLVTKTILEV
VKVCHEHGVIHRDLKPENFLFANNSENAPLKAIDFGLSIFFEPGQRFGEIVGSPYYMAPE
VLRRNYGPEIDVWSTGVILYILLCGVPPFWAETEEGIAQAIVYGEIDFERDPWPRVSEDA
KDLVKGMLDPNPYSRLTLDELLESRWIQNADKVPNIPLGERVRTRIKQFSLMNKFKKKVL
SVVADNLPDDEVDGIKEMFHMMDTDKNGNLNFQELKDGLYMIGQPVPDHDVQLLLDAADC
DGNGMLDCEEFVTLAVHLKKISNDDLLREAFLYFDKDQSGYIEFEELQLALLDDHSGPAN
DQIVHEIIFDADLDKDGRISLEEFKAMMTTGMDWKMGSRQYSRAMLNALSVRLFNKDNNN
LFN
>PcCDPK35
MLGFKDENFLNAYQMVLPIAVEDVKREVKILRALAGHENVVQFYNAFDDDSYVYIVMELC
EGGELLDRILSKKDSRYTEKDAAIVVRQMLKVAAECHLHGFVHRDMKPENFLFKSTKENS
PLKATDFGLSDFIRPGKKFQDIVGSAYYVAPEVLKRKSGPESDVWSIGVITYILLCGRRP
FWDKTEDGIFKEVLRNKPDFRRKPWPGISNAAKDFVKKLLVKNPQARLTAAQALSHPWVR
EGGEASEIPLDISVLSNMRQFVKYSRFKQFALRALASTLDEEELSDVRDQFDAIDVDKNG
VISLEEMRQALEKDLPWKMKDSRVVEILQAIDSNTDGLVDFSEFVAATLHVHQLEEHNSE
KWQQRSRSAFEKFDVDRDGFITPEELKMHTGLRGSIDPLLEEADIDKDGKISLSEFRRLL
RTASMSSRGVTSPSANRAAQKMPLH
>PcCDPK36
MGNCCVTPSGSSDVKKKKKKPNPYSADCGANRGSVDTSKLVVLKNPTGHDINARYDLGRE
LGRGEFGVTYLCTDMETRENFACKSISKKKLRTAVDIEDVRREVEIMKHMPNHPNIVTLK
DTYEDDKAVHIVMELCEGGELFDRIVARGHYTERAAAQVMKTIVEVVQMCHQQGVMHRDL
KPENFLFATKKETSPLKAIDFGLSVFFTPGERFNEIVGSPYYMAPEVLKRNYGPEIDIWS
AGVILYILLCGVPPFWAETEQGVAQAIIRAVIDFKRDPWPKVSESAKDLVKKMLDPDPSR
RLTAQQVLDHSWLQNIKKAPNVSLGETVKARLKQFSVMNKLKKRALRVIAEHLSVEEVAG
IKEAFDKMDSEKRGKINLGEFRTGLHKLGHQIPDTDVQILMEAADVDGDGMLNYGEFVAV
SVHLKKMANDEHLHKAFAFFDRNGNGYIEIEELRDALNDEDDANSEEIINAIMGDVDTDK
DGRISYEEFASMMKAGTDWRKASRQYSRERFNSLSIKLLRDGSLHLANEGR
>PcCDPK37
MGPCMSLQRKTALLRKKVTKQDHHNRLDIDSPPHHPHHHPHHPENVKFSGKLLRQSRPIH
VLKDATGDDILKKYRLGKELGRGEFGVTYECIDEASGESFACKKISKSKLRTDIDVEDVR
REVEIMRHLPAHPNIVRYKEVYEDKEAIYLVMELCEGGELFDRIVARGHYTERAASLVTK
TILEVVKVCHEHGVIHRDLKPENFLFANNSENAPLKAIDFGLSIFFEPGQRFGEIVGSPY
YMAPEVLRRNYGPEIDVWSTGVILYILLCGVPPFWAETEEGIAQAIVYGEIDFERDPWPR
VSEDAKDLVKGMLDPNPYSRLTLDELLESRWIQNADKVPNIPLGERVRTRIKQFSLMNKF
KKKVLSVVADNLSDDEVDGIKEMFHMMDTDKNGNLNFQELKDGLYMIGQPVPDHDVQLLL
DAADCDGNGMLDCEEFVTLAVHLKKISNDDLLREAFLYFDKDQSGYIEFEELQLALLDDH
SGPANDQIVHEIIFDADLDKDGRISLEEFKAMMTTGMDWKMGSRQYSRAMLNALSVRLFY
KDNNNLFN
>PcCDPK38
MGSCFSTTKVSGANSNTPSTSNATTSHHQNRRSAAAAKQAPATSSSVTAKKQEGSHNIKT
REHAKNQQQRPSQQIIKNSSKRPSGVIPCGKRTDFGYDKDFDKRYTIGKLLGHGQFGYTY
VAIDKSNGDRVAVKKIDKNKMVLPIAVEDVKREVKILRALAGHENVVQFYNAFDDDSYVY
IVMELCEGGELLDRILSKKDSRYTEKDAAIVVRQMLKVAAECHLHGFVHRDMKPENFLFK
STKENSPLKATDFGLSDFIRPGKKFQDIVGSAYYVAPEVLKRKSGPESDVWSIGVITYIL
LCGRRPFWDKTEDGIFKEVLRNKPDFRRKPWPGISNAAKDFVKKLLVKNPQARLTAAQAL
SHPWVREGGEASDIPLDISVLSNMRQFVKYSRFKQFALRALASTLDEEELSDVRDQFDAI
DVDKNGVISLEEMRQALEKDLPWKMKDSRVVEILQAIDSNTDGLVDFSEFVAATLHVHQL
EEHNSEKWQQRSRSAFEKFDVDRDGFITPEELKMHTGLRGSIDPLLEEADIDKDGKISLS
EFRRLLRTASMSSRGVTSLSANRAAQKMPLH
>PcCDPK39
MGSCFSTTKVSGANSNTPSTSNATTSHHQNRRSAAAAKQVPATSSSVTAKRQEGSHNIKT
REHAKNQQQRPSQQIIKNSSKRPSGVIPCGKRTDFGYDKDFNKRYTIGKLLGHGQFGYTY
VAIDKSNGDRVAVKKIDKNKMVLPIAVEDVKREVKILRALAGHENVVQFYNAFDDDSYVY
IVMELCEGGELLDRILSKKDSRYTEKDAAIVVRQMLKVAAECHLHGFVHRDMKPENFLFK
STKENSPLKATDFGLSDFIRPGKKFQDIVGSAYYVAPEVLKRKSGPESDVWSIGVITYIL
LCGRRPFWDKTEDGIFKEVLRNKPDFRRKPWTGISNAAKDFVKKLLVKNPQARLTAAQAL
SHPWVREGGEASEIPLDISVLSNMRQFVKYSRFKQFALRALASTLDEEELSDVRDQFDAI
DVDKNGVISLEEMRQALEKDLPWKMKDSRVVEILQAIDSNTDGLVDFSEFVAATLHVHQL
EEHNSEKWQQRSRSAFEKFDVDRDGFITPEELKMHTGLRGSIDPLLEEADIDKDGKISLS
EFRRLLRTASMSSRGVTSPSANRAAQKMPLH
>PcCDPK40
MGNCCRSPAAVAREDVKSCNFSGHDHGRKDKSSGNVKKAVTVLTDVKKENIEEKYLVDRE
LGRGEFGVTYLCIERETREMLACKSISKRKLRTAVDVEDVRREVAIMKHLPQNSSIVSLK
EAREDENAVHLVMELCEGGELFDRIVARGHYTERAAAAVTRTIVEVVQLCHKHGVIHRDL
KPENFLFANKKENSPLKAIDFGLSIFFKPGEKFSEIVGSPYYMAPEVLRRNYGPEIDIWS
AGVILYILLCGVPPFWAESEQGVAQAIIRGKIDFEREPWPSMSDSAKSLVRQMLEPDAKL
RLTAKQVLEHPWLQNAKKAPNVPLGDVVKSRLKQFTLMNRFKRKALRVIADFLSNEEVES
IKEIFAKIDTDNDGVVSTEELKIGLEKFNSQLSESEVQMFVEAVDANGKGTLDFGEFLAI
SLHLQRMANDEHLHKAFSYFDKDANGYIEPGELQDALMEDGTDCSTDVANDIFQEVDTDK
DGRISYDEFLSMMKTGTDWRKASRHYSRGRFNSLSIKLMKDGSINLGE
>PcCDPK41
MGICYSTKKVAGSNTNPRTSPVTIHHHTRHQGAAKPPPSKTRSALTSRKQEGSRHKAKNQ
QKQRHSPQNVKSNSRRPNGVIPCGKRTDFGYEKDFDARYTIGKLLGHGQFGYTFVAVDKS
NGDRVAVKRIEKNKMVLPIAVEDVKREVKILKALAGHENVVHFYNAFEDDCHVYIVMELC
EGGELLDRILSKKDNRYAEKDAAIVVRQMLRVAAECHLHGLVHRDMKPENFLFKSSKESS
SLKATDFGLSDFIRPGKKFQDIVGSAYYVAPEVLKRKSGPESDVWSIGVITYILLCGRRP
FWDKTEDGIFKEVLRNKPDFRRKPWPSISSAAKDFVKKLLVKDPHARLTAAQALSHPWVR
EGGEASDIPLDISVLSNMRRFVTYSRLKQFALRALAGTLDDEELADLRDQFDAIDVDKNG
AISLEEMRQAMAKDLPWKMKEPRVLEILQAIDSNTDGLVDFSEFVAATLHVHQLEEHSSE
KWQDRSQAAFDKFDVDRDGYITPDELKMHTGLRGSIDMLLEEADIDNDGKISLYEFRRLL
RTASMSSRCPSANQVTRKSQHQ
>PcCDPK42
MGSCFSTTKVSGANSNTPSTSNATTSHHQNRRSAAAAKQVPATSSSVTAKKQEGSHNIKT
REHAKNQQQRPSQQIIKNSSKRPSGVIPCGKRTDFGYDKDFDKRYTIGKLLGHGQFGYTY
VAIDKSNGDRVAVKKIDKNKMVLPIAVEDVKREVKILRALAGHENVVQFYNAFDDDSYVY
IVMELCEGGELLDRILSKKDSRYTEKDAAIVVRQMLKVAAECHLQSFVHRDMKPENFLFK
STKENSPLKATDFGLSDFIRPGKKFQDIVGSAYYVAPEVLKRKSGPESDVWSIGVITYIL
LCGRRPFWDKTEDGIFKEVLRNKPDFRRKPWPGISNAAKDFVKKLLVKNPQARLTAAQAL
SHPWVREGGEASEIPLDISVLSNMRQFVKYSRFKQFALRALASTLDEEELSDVRDQFDAI
DVDKNGVISLEEMRQALEKDLPWKMKDSRVVEILQAIDSNTDGLVDFSEFVAATLHVHQL
EEHNSEKWQQRSRSAFEKFDVDRDGFITPEELKMHTGLRGSIDPLLEEADIDKDGRISLS
EFRRLLRTASMSSRGVTSPSANRAAQKMPLH
>PcCDPK43
MGNCCVTPSGSSDIKKKKKKPNPYSADCGANHGSVDTSKLVVLKNPTGHDINARYDLGRE
LGRGEFGVTYLCTDMETREKFACKSISKKKLRTAVDIEDVRREVEIMKHMPKHPNIVTLK
DTYEDDKAVHIVMELCEGGELFDRIVARGHYTERATAQVMKTIVEVVQMCHQQGVMHRDL
KPENFLFATKKETSPLKAIDYGLSVFFTPGERFNEIVGSPYYMAPEVLRRNYGPEIDIWS
AGVILYILLCGVPPFWAETEQGVAQAIIRSVIDFKRDPWPKVSESAKDLVKKMLDPDPSR
RLTAQQVLDHTWLQNIKKAPNVSLGETVKARLKQFSVMNKLKKRALRVIAEHLSVEEVAG
IKEAFDKMDSEKRGKINLGEFRIGLQKLGHQIPDTDVQILMEAADVDGDGMLNYGEFVAV
SVHLKKMANDEHLHKAFAFFDRNGNGYIEIEELRDALNDEDDANSEEIINAIMGDVDTDK
DGRISYEEFASMMKAGTDWRKASRQYSRERFNSLSIKLLRDGSLHLANEGR
>PcCDPK44
MGICYSTKKVAGSNTNPRTAPVNAHHHSRHQGAAKPPPSKTRSAFASRKQEGSRHKSKNQ
QKQRHSPQNVKSNSRRPNGVIPCGKRTDFGYEKDFDARYTIGKLLGHGQFGYTFVAVDKS
NGDRVAVKRIEKSKMVLPIAVEDVKREVKILKALAGHENVVQFYNAFEDDCHVYIVMELC
EGGELLDRILSKKDNRYAEKDAAIVVRQMLRVAAECHLHGLVHRDMKPENFLFKSSKESS
SLKATDFGLSDFIRPGKKFQDIVGSAYYVAPEVLKRKSGPESDVWSIGVITYILLCGRRP
FWDKTEDGIFKEVLRNKPDFRRKPWPSISSAAKDFVKKLLVKDPHARLTAAQALSHPWVR
EGGEASDIPLDISVLSNMRRFVTYSRLKQFALRALAGTLDDEELADLRDQFDAIDVDKNG
AISLEEMRQAMAKDLPWKMKESRVLEILQAIDSNTDGLVDFSEFVAATLHVHQLEEHSSE
KWQDRSQAAFDKFDVDRDGYITPDELKMHTGLRGSIDMLLEEADIDKDGKISLYEFRRLL
RTASMSSRCPSANQVTRKSQHQ
>PcCDPK45
MGNCCATPQTSEEQRRKKPNPFAGDFDSSSVQNGGYKSFVLEKTTGHNIEEFYELGRELG
RGEFGVTYMCTDKSNGDVFACKSISKKKLRTRVDIEDVRREVEIMKHLPQHPNIVTLKDT
YEDDKAVHLVMELCEGGELFDRIVARGHYTERAAAAVTRTIVEVIQNCHKHGVMHRDLKP
ENFLFGNKKESAPLKAIDFGLSVFFKPGQRFDEIVGSPYYMAPEVLRRNYGPEIDVWSAG
VILYILLCGVPPFWAETEQGVAQAIIRSVVDFKRDPWPKVSDKAKDLVKKMLNPDPKLRL
TAQEVLDHPWLQNAKSAPNVSLGETVRARLKQFSMMNKLKKRALRVIAEHLSVEEVAGIK
EGFRLMDTGNKGKIDINELRAGLHKLGHQIPEADLVVLMEAGDVDKDGYLDCGEFVAISV
HLRKLGNDDHLRKAFEFFDRNESGYIEIEELRDAFADEVEATSEEVINAIIQDVDTDKDG
RISYEEFAAMMKSGTDWRKASRQYSRERYNSLSLKLMEDGSLQASNEGR
