# Supplementary material for: Identification of the CDPK gene family in patchouli and functional analysis in response to continuous cropping stress
Source: Front Plant Sci. 2023 Nov 22;14:1300073. doi: 10.3389/fpls.2023.1300073 (PMC10702526; doi:10.3389/fpls.2023.1300073)
Supplement: Supplementary file 3 [file Table_2.xlsx]

## Sheet: Sheet1
The protein sequences of cloned genes PcCDPK25 and PcCDPK38
PcCDPK25
MGNCNACIKSSEKKPPNSKPSTPKPRKKHREHYPNPYTGSPSPIRVLKDFFPRTKISDKYILGRELGRGEFGITYLCTDRETREALACKSISKKKLRTAVDIEDVRREVAIMSSLPEHHNIVKLRATYEDNEAVHLVMELCEGGELFDRIVARGHYSERAAASVARTVAEVVRMCHQNGVMHRDLKPENFLFANKKENSALKVIDFGLSVFFKPGERFSEIVGSPYYMAPEVLKRNYGPEVDIWSSGVILYILLCGVPPFWAETEQGVALAILRGVIDFKREPWPQISESAKSLVRQMLELDPKKRLTAQQVLDHPWIQNAKKASNVPLGDIVRARLKQFSVMNRFKKKALRVVAEHLSVEEVEVIREMFAIMDTDNDGKVTYEELKAGLRKVGSQLAE…
PcCDPK38
MGSCFSTTKVSGANSNTPSTSNATTSHHQNRRSAAAAKQVPATSSSVTAKKQEGSHNIKTREHAKNQQQRPSQQIIKNSSKRPSGVIPCGKRTDFGYDKDFDKRYTIGKLLGHGQFGYTYVAIDKSNGDRVAVKKIDKNKMVLPIAVEDVKREVKILRALAGHENVVQFYNAFDDDSYVYIVMELCEGGELLDRILSKKDSRYTEKDAAIVVRQMLKVAAECHLHGFVHRDMKPENFLFKSTKENSPLKATDFGLSDFIRPGKKFQDIVGSAYYVAPEVLKRKSGPESDVWSIGVITYILLCGRRPFWDKTEDGIFKEVLRNKPDFRRKPWPGISNAAKDFVKKLLVKNPQARLTAAQALSHPWVREGGEASEIPLDISVLSNMRQFVKYSRFKQFALR…
